# Supplementary material for: Zeolitic imidazolate framework-8 was coated with silica and investigated as a flame retardant to improve the flame retardancy and smoke suppression of epoxy resin
Source: PubMed Central journal article supplement (PMC9077404; doi:10.1039/c7ra12816a), 2018-01-11
Supplement: RA-008-C7RA12816A-s001.pdf [file RA-008-C7RA12816A-s001.pdf]

## Supporting information

### Zeolitic imidazolate framework-8 was coated with silica and as a flame retardant to improve the flame retardancy and smoke suppression of epoxy resin

Wenzong Xu,<sup>\*,†</sup> Guisong Wang,<sup>†</sup> Yucheng Liu,<sup>†</sup> Rui Chen<sup>†</sup> and Wu Li<sup>†</sup>

<sup>†</sup>School of Materials Science and Chemical Engineering, Anhui Jianzhu University, 292 Ziyun Road, Hefei, Anhui 230601, People's Republic of China

\*Correspondence to: Wenzong Xu

(Tel./Fax:+86-0551-63828157. Email: [wenzongxu@ahjzu.edu.cn](mailto:wenzongxu@ahjzu.edu.cn))

#### The content of the supporting information:

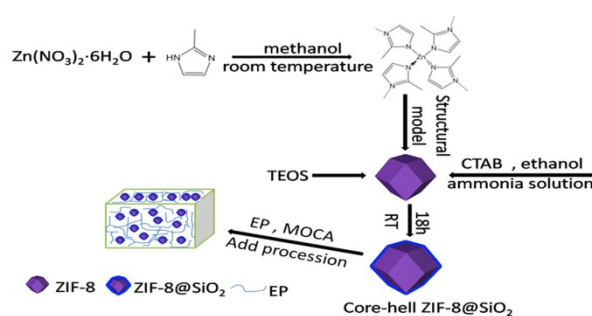

**Scheme S1.** Illustration of synthesis of ZIF-8@SiO<sub>2</sub> and preparation of EP composites.

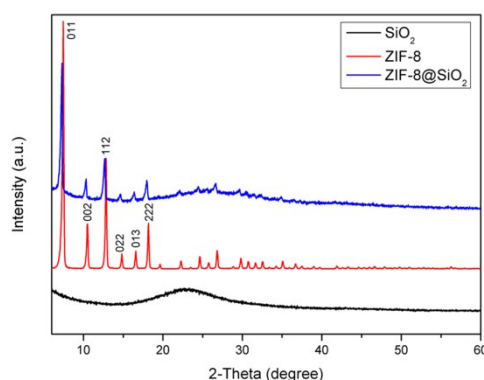

**Figure S1.** XRD patterns of SiO<sub>2</sub>, ZIF-8 and ZIF-8@SiO<sub>2</sub>.

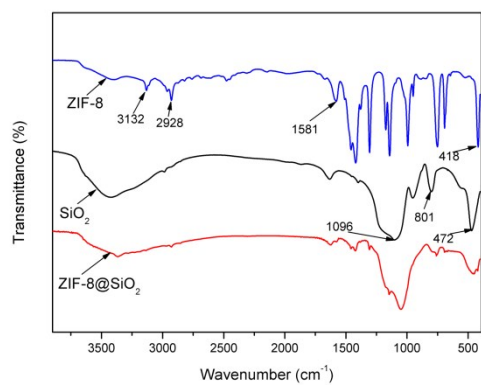

**Figure S2.** FTIR spectra of SiO<sub>2</sub>, ZIF-8 and ZIF-8@SiO<sub>2</sub>.

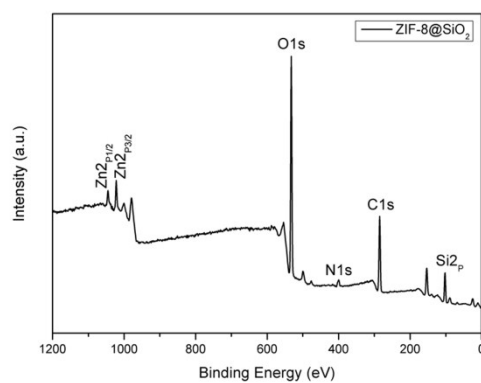

**Figure S3.** XPS spectrum of ZIF-8@SiO<sub>2</sub>.

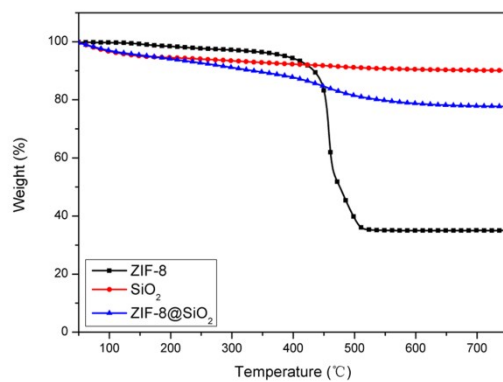

**Figure S4.** TG curves of SiO<sub>2</sub>, ZIF-8 and ZIF-8@SiO<sub>2</sub>.
